# Supplementary material for: Intermediate-High Risk Pulmonary Embolism
Source: PubMed Central journal article supplement (PMC6892655; doi:10.1055/s-0039-3401003), 2019-12-04
Supplement: 10-1055-s-0039-3401003-s190048oa.pdf [file 10-1055-s-0039-3401003-s190048oa.pdf]

**Supplementary Table S1** 30-day clinical events after diagnosis and treatment for hemodynamically stable patients with acute symptomatic pulmonary embolism

|                                   | Intermediate-high risk PE<br>N = 97 | Low- or intermediate-low risk PE<br>N = 918 | p-Value |
|-----------------------------------|-------------------------------------|---------------------------------------------|---------|
| <b>Primary outcome, n (%)</b>     |                                     |                                             |         |
| All-cause death                   | 10 (10%)                            | 23 (2.5%)                                   | <0.001  |
| PE-related death                  | 7 (7.2%)                            | 11 (1.2%)                                   | <0.001  |
| <b>Secondary outcomes, n (%)</b>  |                                     |                                             |         |
| Complicated course <sup>a</sup>   | 23 (24%)                            | 19 (2.1%)                                   | <0.001  |
| Hemodynamic collapse <sup>b</sup> | 17 (18%)                            | 16 (1.7%)                                   | <0.001  |
| Recurrent PE                      | 2 (2.1%)                            | 4 (0.4%)                                    | 0.11    |
| Nonfatal recurrent PE             | 0 (0%)                              | 3 (0.3%)                                    | 1.00    |
| Major bleeding                    | 4 (4.1%)                            | 33 (3.6%)                                   | 0.77    |

Abbreviation: PE, pulmonary embolism.

<sup>a</sup>Defined as PE-related mortality, or hemodynamic collapse, or recurrent PE.

<sup>b</sup>Defined as the use of at least one of the following: cardiopulmonary resuscitation, systolic blood pressure < 90 mm Hg for at least 15 minutes, need for catecholamine administration, or need for thrombolysis.
